# Supplementary material
Source: PubMed Central journal article supplement (PMC4313828)
Supplement: pnas.201424175SI.pdf [file pnas.201424175SI.pdf]

# Supporting Information

Sherwood et al. 10.1073/pnas.1424175112

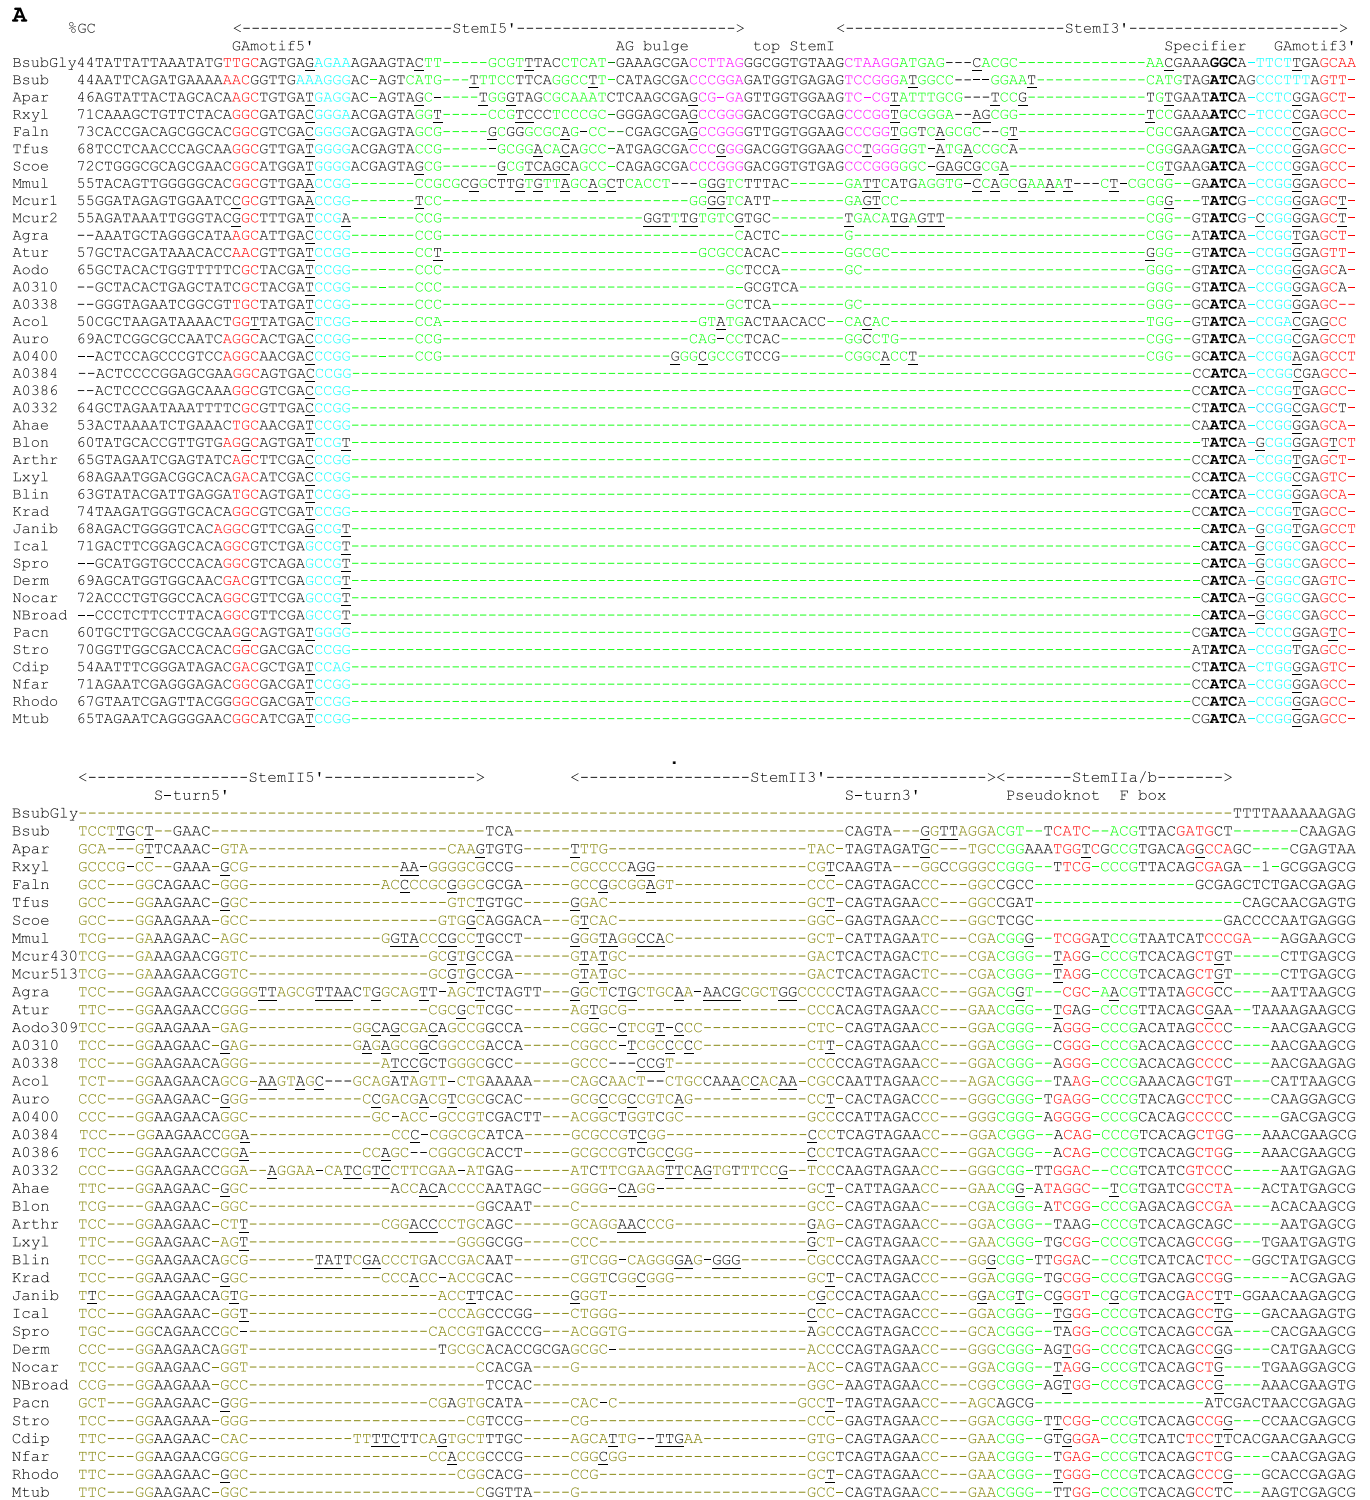

Fig. S1. (Continued)

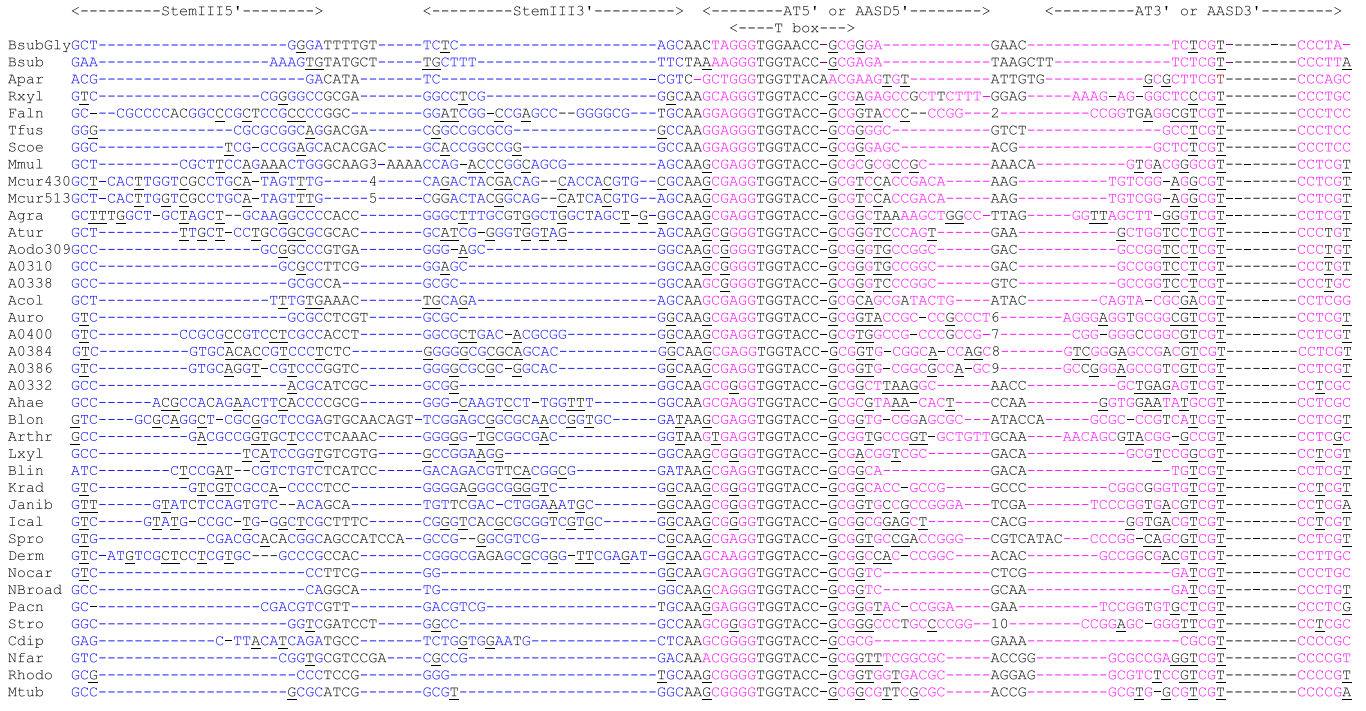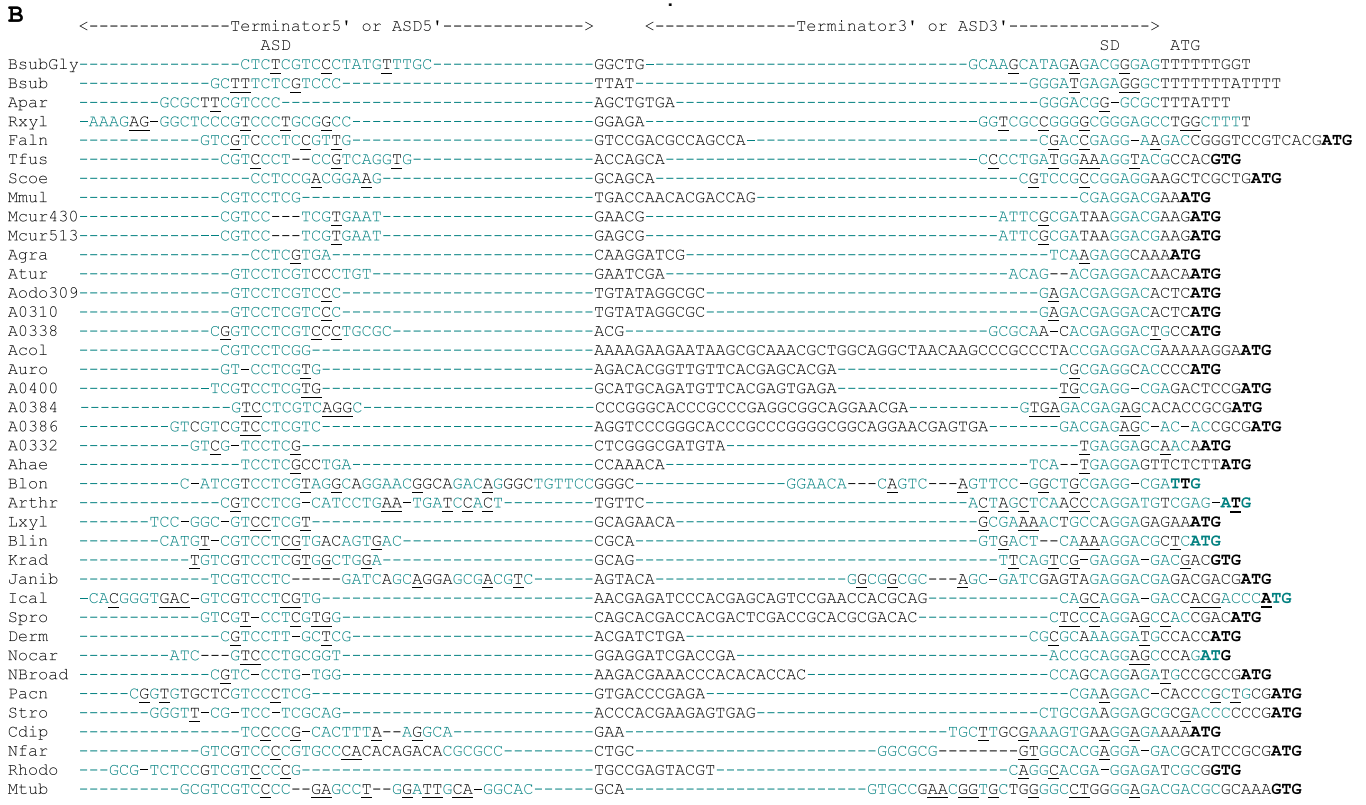

**Fig. S1.** Alignment of Actinobacteria *ileS* leader regions that represent various classes of structure and possible regulatory mechanisms. The *B. subtilis glyQS* and *ileS* sequences are shown for comparison. (A) Alignment of sequences that extend from 15 nt 5' of the GA motif through the antisequestorator helix (or antiterminator). (B) Alignment of sequences that form the sequestorator helix (or terminator) extending through the ATG for translationally controlled genes (or the run of T's for transcriptionally controlled genes). The 3' side of the antisequestorator helix (or antiterminator) in *A* is partially repeated within the 5' side of the sequestorator helix (or terminator) in *B*. Dashed arrows at the top indicate helical regions, and the same colored regions indicate paired regions. Helical regions are aligned at each end of the paired region with a spacer, and colored dashes are inserted for alignment based on conserved sequences. A black base within a helical area means that this base does not have a counterpart on the opposite side of the helix, whereas a black underlined base means that this base does have a counterpart on the opposite side of the helix. A black dash in a helix means there is an extra base opposite to this location in the other side of the helix. In *Rxyl*, there is an extra helix after the pseudoknot: GGGTGTGCCCGCCG<sup>U</sup>CAACC; in *Faln*, there is an additional sequence at the top of the

Legend continued on following page

antisequestrator helix: TCCGGGGCGGGACG-CGG-CGGCGGGCAGGCCCGTCGGCCGTCGTCACGC-GCGG; in Mmul, there are two extra helices in stem III: TTCGGG ACT-TGAAACCTTTGCCAGGGAAACG-GGCAAGCACCTCATGAACCCGAAACCAGATGGGCACGGGACATGAACGCCCGCGGGAATACGGGTGGCGCCTCATGAACCTC-ACCATC; in Mcur43063, there is an additional sequence at the top of stem III: ACCGCACCCGGATAGGTCGG-CGCC; in Mcur51333, there is an additional sequence at the top of stem III: ACCGCACCCGGATAGGTCGG-CGCC; in Auro, there is an additional sequence at the top of the antisequestrator helix: CG-GCC-TGCCAGGGCAGC; in A0400, there is an additional sequence at the top of the antisequestrator helix: TCGTCGGCCACCGGCCGGCG; in A0384, there is an additional I sequence at the top of the antisequestrator helix: CGGGCACCAGGCCCG; in A0386, there is an additional sequence at the top of the antisequestrator helix: CGG-ACGCCAGTCCCG; in Stro, there is an additional sequence at the top of the antisequestrator helix: CACGCCGACGGCGT-. Acol, *Actinomyces coleocanis* Difco Sporulation Media (DSM) 15436; Agra, *Actinomyces graevenitzi* C83; Ahae, *Arcanobacterium haemolyticum* DSM 20595; Aodo309, *Actinomyces odontolyticus* F0309; A0310, *Actinomyces* sp. oral taxon 180 str. F0310; A0332, *Actinomyces* sp. oral taxon 848 str. F0332; A0338, *Actinomyces* sp. oral taxon 178 str. F0338; A0384, *Actinomyces* sp. oral taxon 175 str. F0384; A0386, *Actinomyces* sp. oral taxon 170 str. F0386; A0400, *Actinomyces* sp. oral taxon 448 str. F0400; Apar, *Atopobium parvulum* DSM 20469; Arthr, *Arthrobacter* sp. FB24; Atur, *Actinomyces turicensis* ACS-279-V-Col4; Auro, *Actinomyces urogenitalis* DSM 15434; Blin, *Brevibacterium linens* BL2; Blon, *Bifidobacterium longum*; Bsu, *B. subtilis*; Cdip, *Corynebacterium diphtheriae*; Derm, *Dermacoccus* sp. Ellin 185; Faln, *Frankia alni* ACN14a; Ical, *Intrasporangium calvum* DSM 43043; Janib, *Janibacter* sp. HTCC2649; Krad, *Keneococcus radiotolerans* SR530216; Lxyl, *Leifsonia xyli* subsp. xyli str. CTCB07; Mcur430, *Mobiluncus curtisii* American Type Culture Collection (ATCC) 43063; Mcur513, *Mobiluncus curtisii* ATCC 51333; Mmul, *Mobiluncus mulieris* FB024-16; Mtub, *M. tuberculosis*; NBroad, Nocardioideae bacterium Broad-1; Nfar, *N. farcinica* IFM 10152; Nocar, *Nocardioides* sp. JS614; Pacn, *Propionibacterium acnes*; Rhodo, *Rhodococcus* sp. DK17; Rxyl, *Rubrobacter xylanophilus* DSM 9941; Scoe, *S. coelicolor* A32; Spro, *Serinicoccus profundus* Marine Culture Collection of China (MCCC) 1A05965; Stro, *Salinispora tropica* CNB-440; Tfus, *Thermobifida fusca* YX.

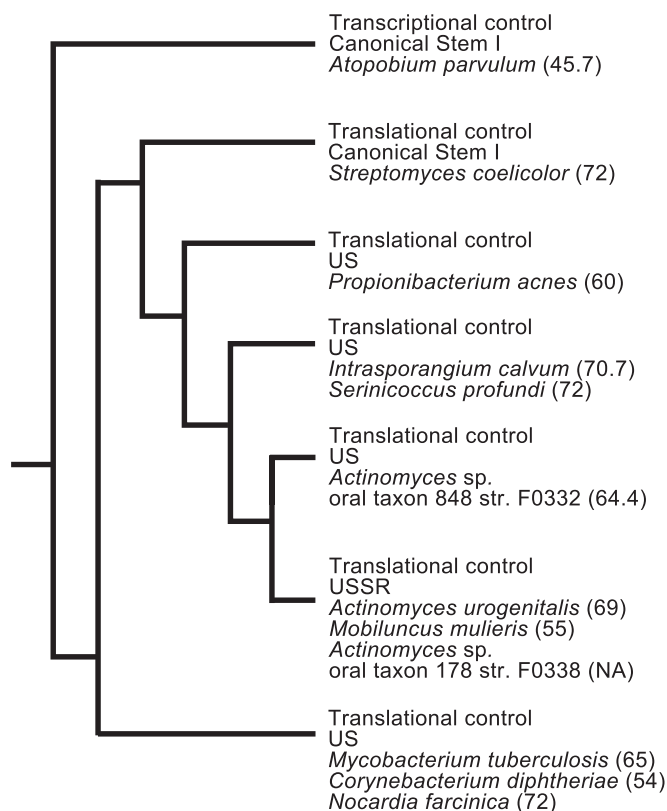

**Fig. S2.** Modified phylogenetic tree of species from the phylum Actinobacteria labeled with types of Stem I found in the *ileS* leader sequences (1, 2). Numbers in parentheses are the percentage of G + C genome contents (1–4).

1. Gao B, Gupta RS (2012) Phylogenetic framework and molecular signatures for the main clades of the phylum Actinobacteria. *Microbiol Mol Biol Rev* 76(1):66–112.
2. Gillespie JJ, et al. (2011) PATRIC: The comprehensive bacterial bioinformatics resource with a focus on human pathogenic species. *Infect Immun* 79(11):4286–4298.
3. Glavina Del Rio T, et al. (2010) Complete genome sequence of *Intrasporangium calvum* type strain (7 KIP T). *Stand Genomic Sci* 3(3):294–303.
4. Xiao J, Luo Y, Xu J (2011) Genome sequence of *Serinicoccus profundus*, a novel actinomycete isolated from deep-sea sediment. *J Bacteriol* 193(22):6413.

**Table S1. Actinobacteria genera grouped by Stem I class of the T box riboswitch found in the *ileS* gene**

| No T box riboswitches   | Canonical T box riboswitches | USSR T box riboswitches | US T box riboswitches    |
|-------------------------|------------------------------|-------------------------|--------------------------|
| <i>Acidimicrobium</i>   | <i>Atopobium</i>             | <i>Actinomyces</i>      | <i>Actinomyces</i>       |
| <i>Acidothermus</i>     | <i>Catenulispora</i>         | <i>Mobiluncus</i>       | <i>Actinosynnema</i>     |
| <i>Aeromicrobium</i>    | <i>Collinsella</i>           |                         | <i>Amycolatopsis</i>     |
| <i>Blastococcus</i>     | <i>Coriobacterium</i>        |                         | <i>Amycolicoccus</i>     |
| <i>Candidatus</i>       | <i>Frankia</i>               |                         | <i>Arcanobacterium</i>   |
| <i>Conexibacter</i>     | <i>Nocardiopsis</i>          |                         | <i>Arthrobacter</i>      |
| <i>Cryptobacterium</i>  | <i>Olsenella</i>             |                         | <i>Beutenbergia</i>      |
| <i>Eggerthella</i>      | <i>Propionibacterium</i>     |                         | <i>Bifidobacterium</i>   |
| <i>Geodermatophilus</i> | <i>Rubrobacter</i>           |                         | <i>Brachybacterium</i>   |
| <i>Modestobacter</i>    | <i>Streptomyces</i>          |                         | <i>Brevibacterium</i>    |
| <i>Patulibacter</i>     | <i>Streptosporangium</i>     |                         | <i>Cellulomonas</i>      |
| <i>Segniliparus</i>     | <i>Thermobifida</i>          |                         | <i>Clavibacter</i>       |
| <i>Slackia</i>          | <i>Thermobispora</i>         |                         | <i>Corynebacterium</i>   |
| <i>Tropheryma</i>       | <i>Thermomonospora</i>       |                         | <i>Dermacoccus</i>       |
|                         | <i>Kitasatospora</i>         |                         | <i>Dietzia</i>           |
|                         |                              |                         | <i>Gardnerella</i>       |
|                         |                              |                         | <i>Gordonia</i>          |
|                         |                              |                         | <i>Intrasporangium</i>   |
|                         |                              |                         | <i>Janibacter</i>        |
|                         |                              |                         | <i>Jonesia</i>           |
|                         |                              |                         | <i>Kineococcus</i>       |
|                         |                              |                         | <i>Kocuria</i>           |
|                         |                              |                         | <i>Kribbella</i>         |
|                         |                              |                         | <i>Kytococcus</i>        |
|                         |                              |                         | <i>Leifsonia</i>         |
|                         |                              |                         | <i>Microbacterium</i>    |
|                         |                              |                         | <i>Micrococcus</i>       |
|                         |                              |                         | <i>Micromonospora</i>    |
|                         |                              |                         | <i>Mycobacterium</i>     |
|                         |                              |                         | <i>Nakamurella</i>       |
|                         |                              |                         | <i>Nocardia</i>          |
|                         |                              |                         | <i>Nocardioideae</i>     |
|                         |                              |                         | <i>Nocardioidea</i>      |
|                         |                              |                         | <i>Parascardovia</i>     |
|                         |                              |                         | <i>Propionibacterium</i> |
|                         |                              |                         | <i>Pseudonocardia</i>    |
|                         |                              |                         | <i>Renibacterium</i>     |
|                         |                              |                         | <i>Rhodococcus</i>       |
|                         |                              |                         | <i>Rothia</i>            |
|                         |                              |                         | <i>Saccharomonospora</i> |
|                         |                              |                         | <i>Salinispora</i>       |
|                         |                              |                         | <i>Sanguibacter</i>      |
|                         |                              |                         | <i>Scardovia</i>         |
|                         |                              |                         | <i>Stackebrandtia</i>    |
|                         |                              |                         | <i>Tsukamurella</i>      |
|                         |                              |                         | <i>Verrucosipora</i>     |
|                         |                              |                         | <i>Xylanimonas</i>       |

**Table S2. Generation of the plasmid vectors and DNA oligonucleotides used in PCR**

| DNA template                                  | Generation of plasmid vectors                                                                                                                                                                                                                                                                                                                                                                                                                                                                                                                                                                                             | PCR primers                                                                                                                                                                                                                                                                                                                                                            |
|-----------------------------------------------|---------------------------------------------------------------------------------------------------------------------------------------------------------------------------------------------------------------------------------------------------------------------------------------------------------------------------------------------------------------------------------------------------------------------------------------------------------------------------------------------------------------------------------------------------------------------------------------------------------------------------|------------------------------------------------------------------------------------------------------------------------------------------------------------------------------------------------------------------------------------------------------------------------------------------------------------------------------------------------------------------------|
| <i>N. farcinica ileS</i>                      | <p>PCR using ligation reaction as a template and<br/>5'-TTTATATGATCATTACGAGGGAGACGGGACGATCCGGCCA-TC-3' and<br/>5'-TAGCTGTCGACGCTGTCGTCCGCCATCGCGGATGCGCCTCCT-3' as primers</p> <p>PCR using <i>B. subtilis</i> chromosomal DNA as a template and<br/>5'-ATTAATCTAGATTACGAAGAATATTCGGGATTGTA-3' and<br/>5'-GCCGTCTCCCTCGTAAATGATCATATAAAAAGATGGACC-3' as primers</p> <p>PCR using products from both of the PCR above as template and<br/>5'-ATTAATCTAGATTACGAAGAATATTCGGGATTGTA-3' and<br/>5'-TAGCTGTCGACGCTGTCGTCCGCCATCGCGGATGCGCCTCCT-3' as primers</p> <p>Insert PCR product into plasmid pFG328 using XbaI, Sall</p> | <p>tRNA-binding reactions:<br/>5'-TTCTCGAATTCTAATACGACTCACTATAGGCGAC-GATCCGGCCATCAC-3'<br/>5'-ACGGGGACGGCCTCGGCGCCCGGTGC-3'</p> <p>Primer extension reactions:<br/>5'-TTCTCGAATTCTAATACGACTCACTATAGGCGAC-GATCCGGCCATCAC-3'<br/>5'-TGCGGGCCTCTTCGTATTACGCCA-3'</p> <p>RNase H cleavage assays:<br/>5'-CCTAATGCAGGAGTCGCATAAGGG-3'<br/>5'-CGATTAAGTTGGGTAACGCCAGG-3'</p> |
| A8G <i>N. farcinica ileS</i>                  | No plasmid generated                                                                                                                                                                                                                                                                                                                                                                                                                                                                                                                                                                                                      | 5'-ATATAATACGACTCACTATAGGCGACGGTCCGGC-CATCACC GGGGAGCCT-3'<br>5'-ACGGGGACGGCCTCGGCGCCCGGTGC-3'<br>5'-TTCTCGAATTCTAATACGACTCACTATAGGCGA-CGATCCGGCCTTAC-3'<br>5'-ACGGGGACGGCCTCGGCGCCCGGTGC-3'                                                                                                                                                                           |
| A16U <i>N. farcinica ileS</i>                 | No plasmid generated                                                                                                                                                                                                                                                                                                                                                                                                                                                                                                                                                                                                      |                                                                                                                                                                                                                                                                                                                                                                        |
| <i>N. farcinica</i> tRNA <sup>Ile</sup>       | Insert ligation reaction product into plasmid pGEM7-54P-tRNQ using XmaI, NcoI                                                                                                                                                                                                                                                                                                                                                                                                                                                                                                                                             |                                                                                                                                                                                                                                                                                                                                                                        |
| <i>N. farcinica</i> tRNA <sup>Ile</sup> ΔACCA | Insert ligation reaction product into pGEM4 plasmid using XbaI, PvuII                                                                                                                                                                                                                                                                                                                                                                                                                                                                                                                                                     | 5'-GAGCGAGGAAGCGGAAGAGCGCCC-3'<br>5'-TGGTGGGCCTAGGAGGA-3'<br>5'-TAATACGACTCACTATAGGGCCTATAGCTCAG-3'<br>5'-GGGCCTAGGAGGACTTGAA-3'<br>5'-TAATACGACTCACTATAGGGCCTATAGCTCAG-3'<br>5'-GTGGTGGGCCTAGGAGGA-3'<br>5'-TAATACGACTCACTATAGGGCCTATAGCTCAG-3'                                                                                                                       |
| <i>N. farcinica</i> tRNA <sup>Ile</sup> Ex1C  | No plasmid generated                                                                                                                                                                                                                                                                                                                                                                                                                                                                                                                                                                                                      |                                                                                                                                                                                                                                                                                                                                                                        |
| <i>N. farcinica</i> U36A tRNA <sup>Ile</sup>  | Site-specific oligomutagenesis of the plasmid pGEM7-54P-tRNQ with <i>N. farcinica</i> tRNA <sup>Ile</sup> template insert using<br>5'-GGTTAGAGCGCTTCGCTGAAAACGAAGAGGTCGGAGG-3' and<br>5'-CCTCCGACCTCTTCGTTTCAGCGAAGCGCTCTAAC-3' oligonucleotides                                                                                                                                                                                                                                                                                                                                                                          | 5'-TGGTGGGCCTAGGAGGA-3'                                                                                                                                                                                                                                                                                                                                                |
| <i>Actinomyces</i> sp. <i>ileS</i>            | Insert ligation reaction product into pGEM4 plasmid using XbaI, PvuII                                                                                                                                                                                                                                                                                                                                                                                                                                                                                                                                                     | 5'-TAATACGACTCACTATAGG-3'<br>5'-GCAGGGACGAGGACCGG-3'                                                                                                                                                                                                                                                                                                                   |
| <i>Actinomyces</i> sp. tRNA <sup>Ile</sup>    | Insert ligation reaction product into pGEM4 plasmid using XbaI, PvuII                                                                                                                                                                                                                                                                                                                                                                                                                                                                                                                                                     |                                                                                                                                                                                                                                                                                                                                                                        |
| <i>S. coelicolor ileS</i>                     | No plasmid generated                                                                                                                                                                                                                                                                                                                                                                                                                                                                                                                                                                                                      | 5'-TAATACGACTCACTATAGGCATGGATGGGGACG-3'<br>5'-GGAGGGACGAGAGCCGTGCT-3'<br>5'-ATATAATACGACTCACTATAGGGCTATAGCTCA-GTTGGTTAGA-3'<br>5'-TGGTGGGGCTAACAGGATTTGAACC-3'<br>5'-TAATACGACTCACTATAGCGGAAGTAGTTCAAGTGG-3'<br>5'-TGGAGCGGAAGACGGGATTTCGAAC-3'                                                                                                                        |
| <i>S. coelicolor</i> tRNA <sup>Ile</sup>      | No plasmid generated                                                                                                                                                                                                                                                                                                                                                                                                                                                                                                                                                                                                      |                                                                                                                                                                                                                                                                                                                                                                        |
| <i>B. subtilis</i> tRNA <sup>Gly</sup>        | No plasmid generated                                                                                                                                                                                                                                                                                                                                                                                                                                                                                                                                                                                                      |                                                                                                                                                                                                                                                                                                                                                                        |
| <i>B. subtilis</i> tRNA <sup>Val</sup>        | PCR using <i>B. subtilis</i> chromosomal DNA as a template and<br>5'-AATATTAATACGACTCACTATAGATTCCGTAGCTCAGCTGG-3'<br>5'-ATAATTCTAGAGCAATGCATGGTGATTCCGACTGGGCTCGAAC-3' as primers Insert into pGEM4 plasmid using XbaI, PvuII                                                                                                                                                                                                                                                                                                                                                                                             |                                                                                                                                                                                                                                                                                                                                                                        |

NcoI, PvuII, Sall, XbaI, and XmaI are restriction enzymes purchased from New England Biolabs, Inc.

**Table S3. DNA oligonucleotides used in primer extension reactions**

| Oligonucleotide name | Sequence                      |
|----------------------|-------------------------------|
| 310-330              | 5'-CGCTATTACGCCAGCTGGCG-3'    |
| 267-289              | 5'-CGATTAAGTTGGGTAACGCCAGG-3' |
